# Supplementary material for: The Evidence for Increased L1 Activity in the Site of Human Adult Brain Neurogenesis
Source: PLOS journal article supplement (doi:10.1371/journal.pone.0117854), 2015-02-17
Supplement: S2 (10.1371/journal.pone.0117854.s002) [file journal.pone.0117854.s002.PDF]

Table S2. Power analysis

| RE type                           | Alu   |                     | L1    |    |     |     |    |                     |    |     |     |    |
|-----------------------------------|-------|---------------------|-------|----|-----|-----|----|---------------------|----|-----|-----|----|
| Genomic region                    | genes | 5 kB upstream genes | genes |    |     |     |    | 5 kB upstream genes |    |     |     |    |
| Tissue                            | DG    | DG                  | CB    | FC | SVZ | DG  | MY | CB                  | FC | SVZ | DG  | MY |
| Power, %                          | 76    | 64                  | 95    | 56 | 93  | 98  | 71 | 80                  | 74 | 95  | 98  | 52 |
| Difference required for 80% power | 69    | 28                  | N/A   | 28 | N/A | N/A | 43 | N/A                 | 13 | N/A | N/A | 21 |

The power of the test was calculated for each comparison and the power correlated with the difference and the p value (the power is shown only for  $p < 0.05$ ). Since for several comparisons the power was  $< 80\%$ , we also calculated how large the difference between simulated and experimental samples should be to obtain the power = 80%. DG - dentate gyrus, CB - cerebellum, FC - frontal cortex, SVZ - subventricular zone, MY - myocardium, N/A - not applicable
